# Supplementary material for: Changes in Cannabis-Attributable Hospitalizations Following Nonmedical Cannabis Legalization in Canada
Source: PubMed Central journal article supplement (PMC10556968; doi:10.1001/jamanetworkopen.2023.36113), 2023-10-05
Supplement: jamanetwopen-e2336113-s002.pdf [file jamanetwopen-e2336113-s002.pdf]

## Data Sharing Statement

Myran. Changes in Cannabis-Attributable Hospitalizations Following Nonmedical Cannabis Legalization in Canada. *JAMA Netw Open*. Published October 05, 2023.  
doi:10.1001/jamanetworkopen.2023.36113

### Data

**Data available:** No

### Additional Information

**Explanation for why data not available:** The data set from this study is held securely at the Institute for Clinical Evaluative Sciences (ICES). While data-sharing agreements prohibit ICES from making the data set publicly available, access may be granted to those who meet pre-specified criteria for confidential access, available at <https://www.ices.on.ca/DAS>.
